# Supplementary material for: Synthesis and optoelectronic properties of air-stable π-conjugated polymers containing both thiophene-2,5-diyl and fused titanacycle units
Source: Royal Society of Chemistry journal article supplement (doi:10.1039/d2py00452f), 2022-01-01
Supplement: d2py00452f1.pdf [file d2py00452f1.pdf]

Electronic Supplementary Information

**Synthesis and Optoelectronic Properties of Air-stable  $\pi$ -Conjugated Polymers  
Containing Both Thiophene-2,5-diyl and Fused Titanacycle Units**

Alvin Tanudjaja, Makoto Higuchi, Tomohiro Imai, Yoshimasa Matsumura, Ryoyu Hifumi,  
Shinsuke Inagi, and Ikuyoshi Tomita\*

Department of Chemical Science and Engineering, School of Materials and Chemical  
Technology, Tokyo Institute of Technology, Nagatsuta-cho 4259-G1-9, Midori-ku, Yokohama  
226-8502, Japan

E-mail: [tomita@cap.mac.titech.ac.jp](mailto:tomita@cap.mac.titech.ac.jp)

## **Table of Contents**

**1. NMR Spectra**

**2. IR Spectra**

**3. SEC Profiles**

**4. DFT and TD-DFT Optimized Molecular Diagrams**

## 1. NMR Spectra

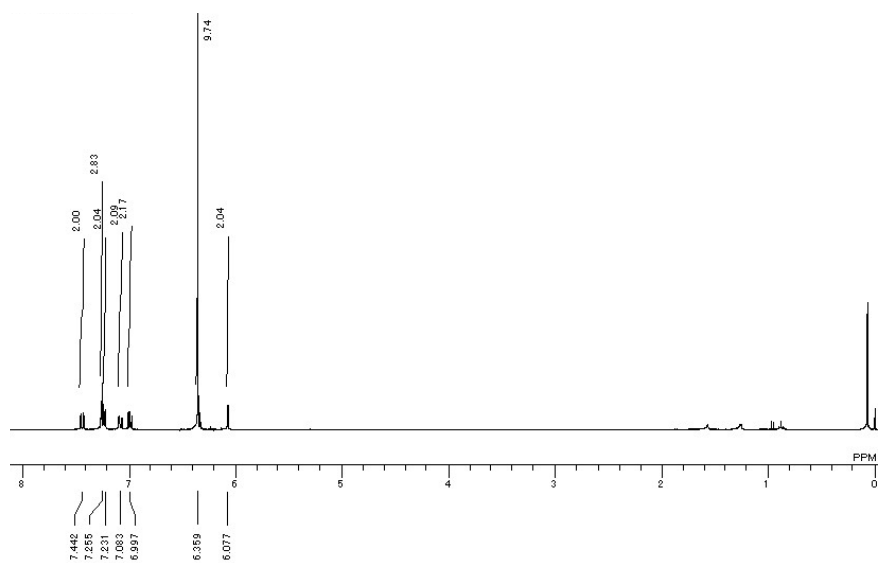

Figure S1.  $^1\text{H}$  NMR spectrum of 4.

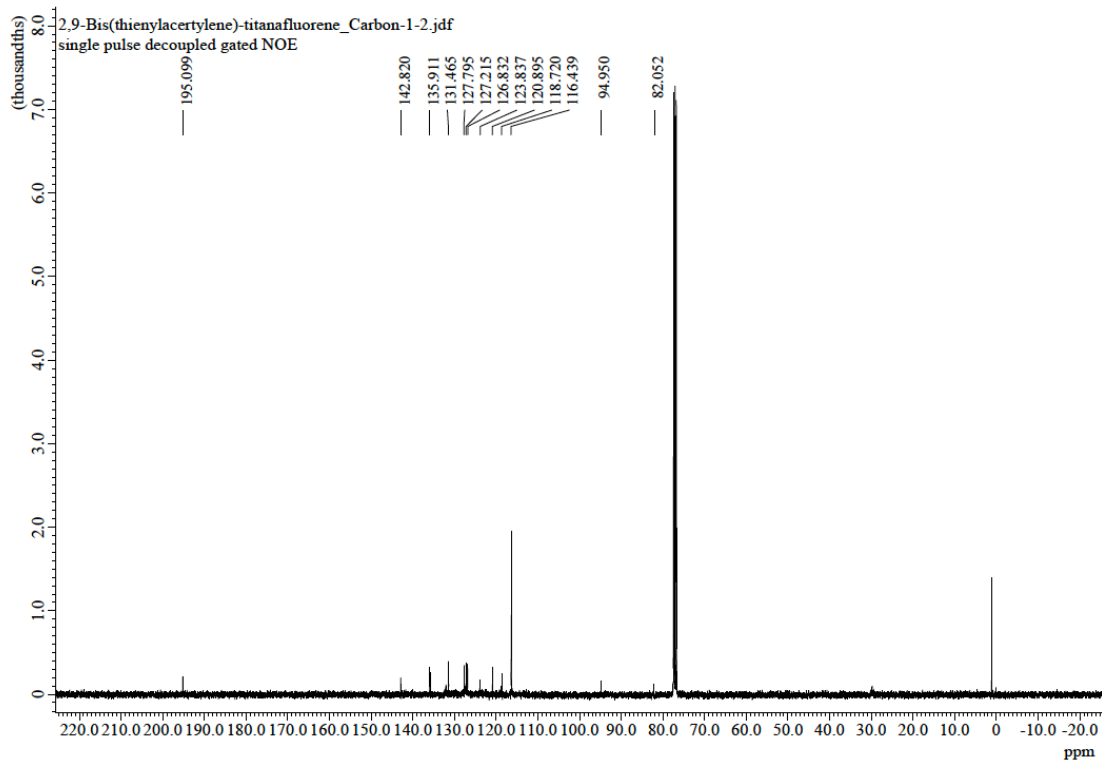

Figure S2.  $^{13}\text{C}\{^1\text{H}\}$  NMR spectrum of 4.

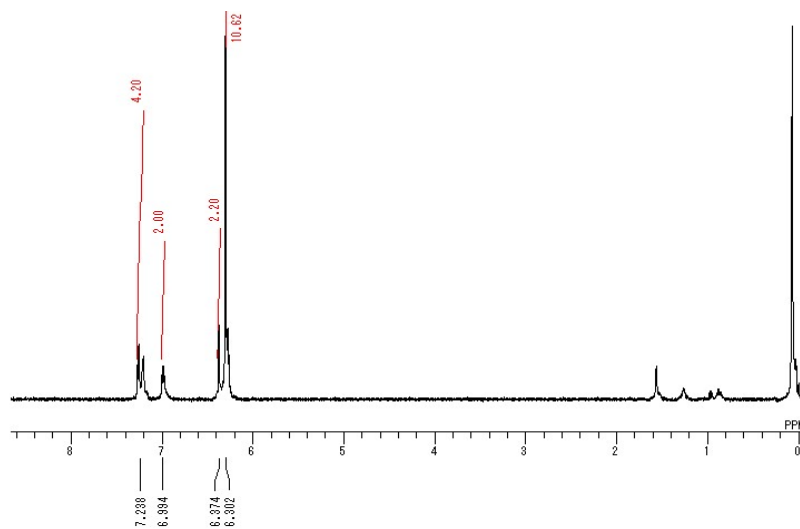

**Figure S3.**  $^1\text{H}$  NMR spectrum of **5**.

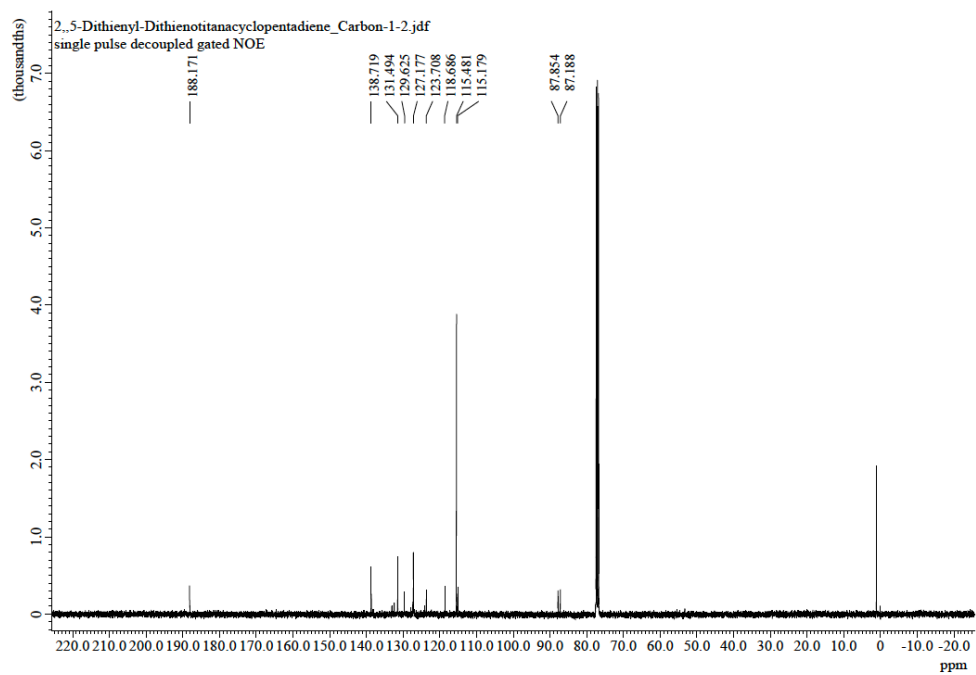

**Figure S4.**  $^{13}\text{C}\{^1\text{H}\}$  NMR spectrum of **5**.

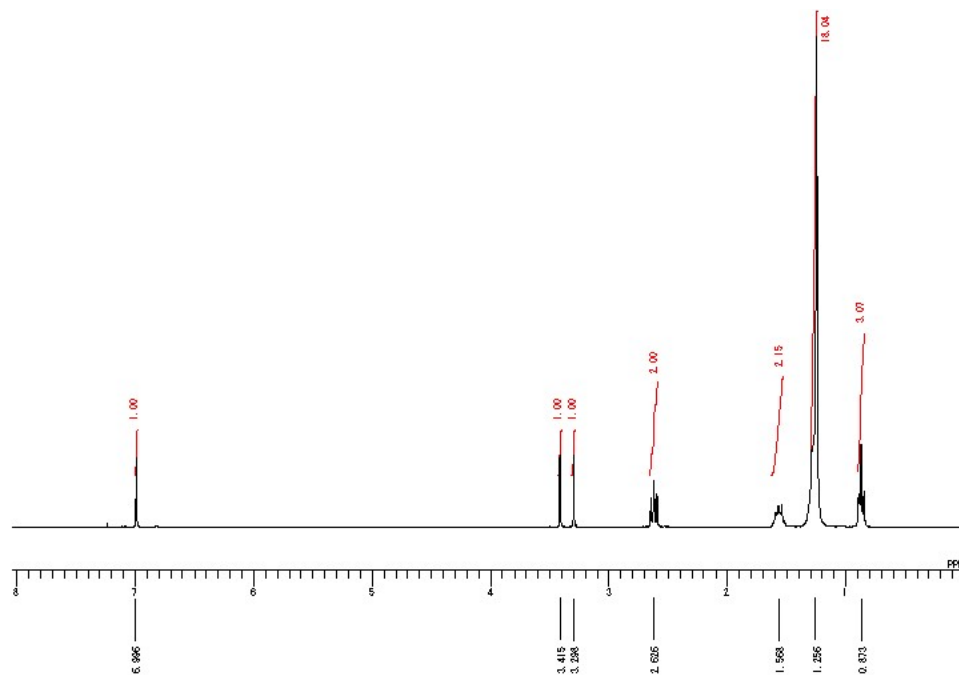

Figure S5.  $^1\text{H}$  NMR spectrum of 6.

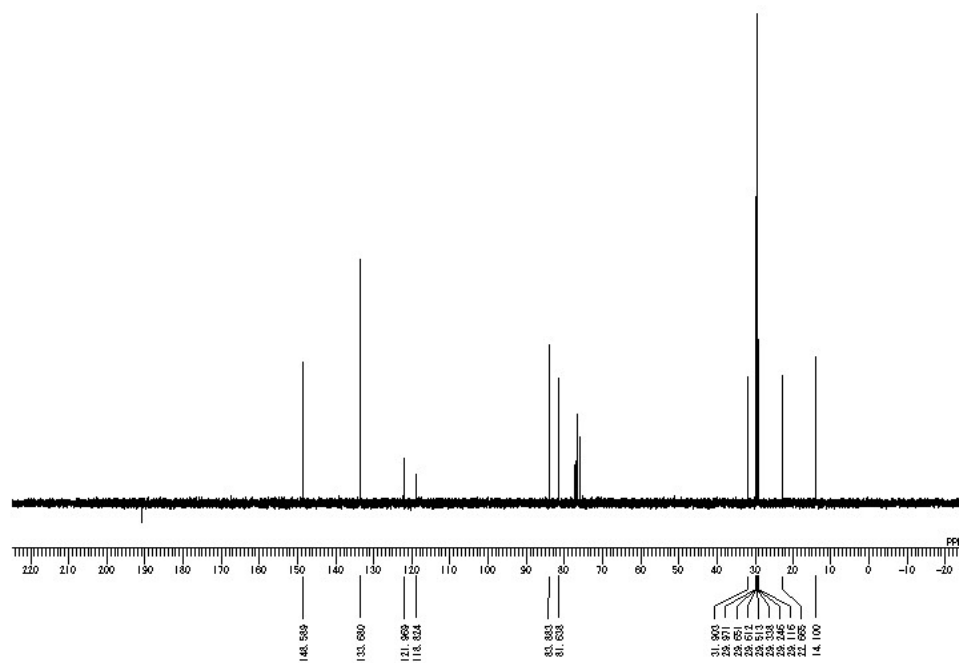

Figure S6.  $^{13}\text{C}\{^1\text{H}\}$  NMR spectrum of 6.

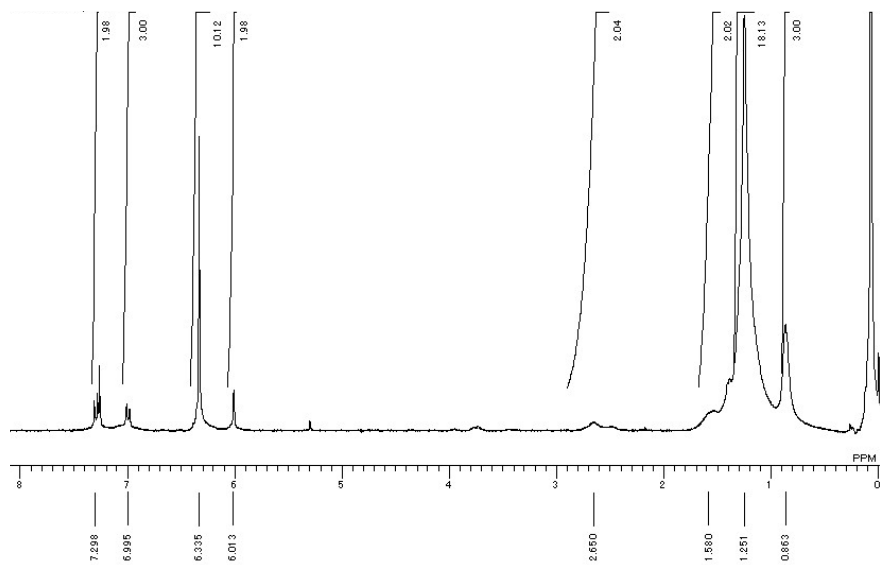

**Figure S7.**  $^1\text{H}$  NMR spectrum of **7**.

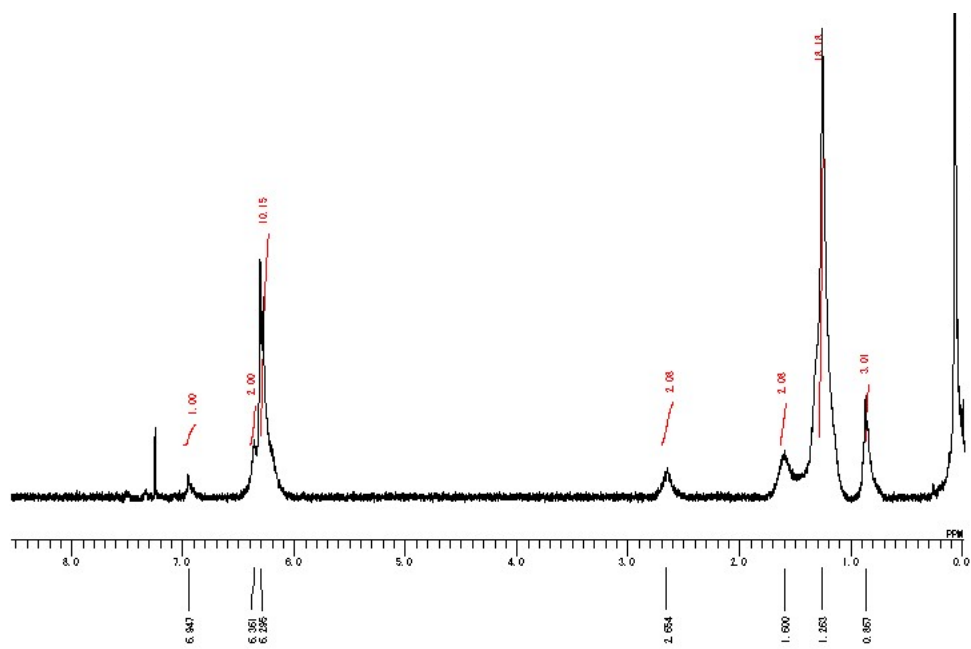

**Figure S8.**  $^1\text{H}$  NMR spectrum of **8**.

## 2. IR Spectra

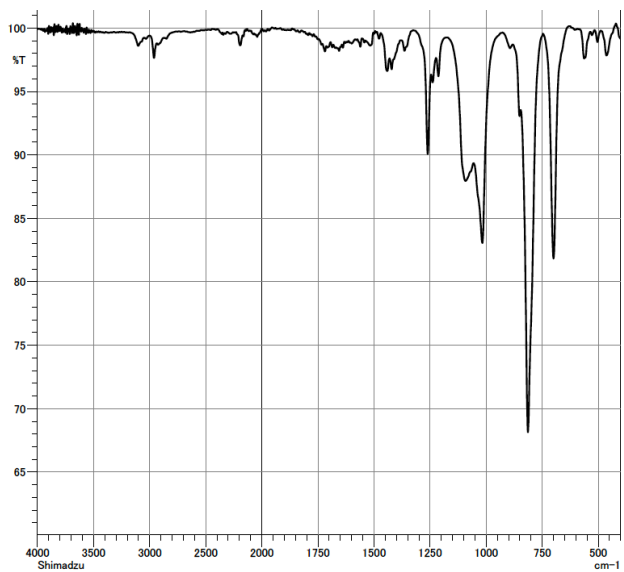

**Figure S9.** IR Spectrum of 4.

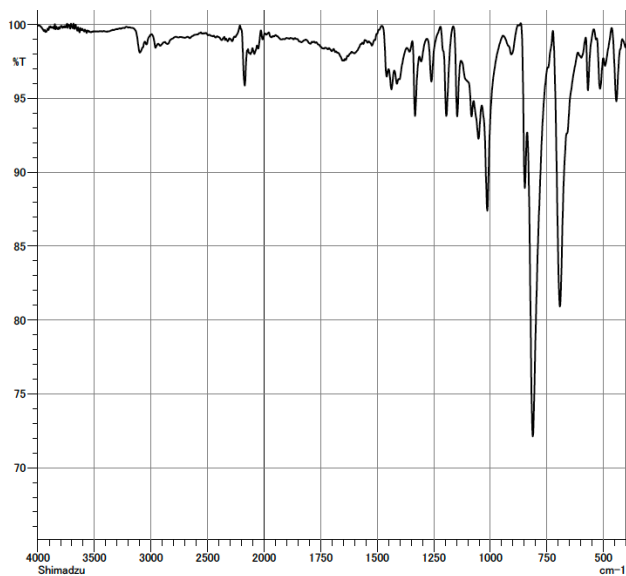

**Figure S10.** IR Spectrum of 5.

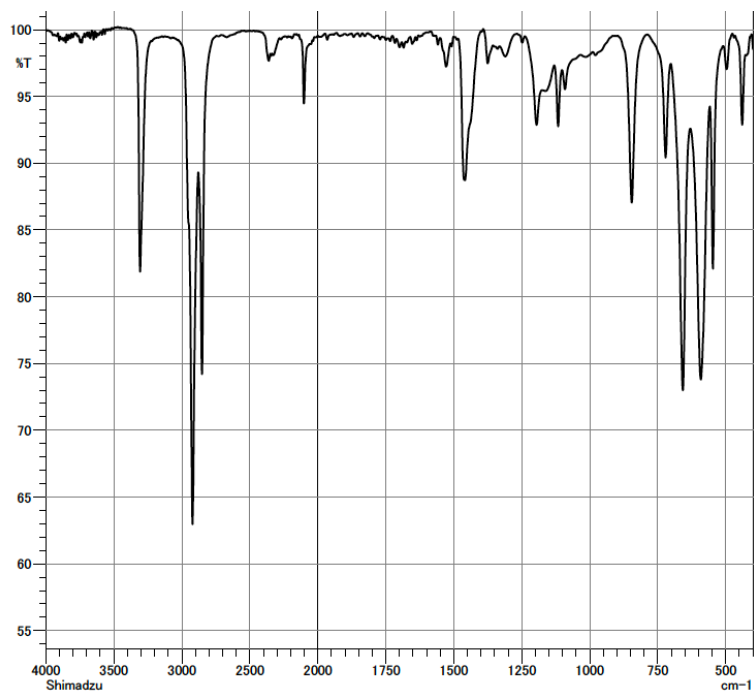

**Figure S11.** IR Spectrum of 6.

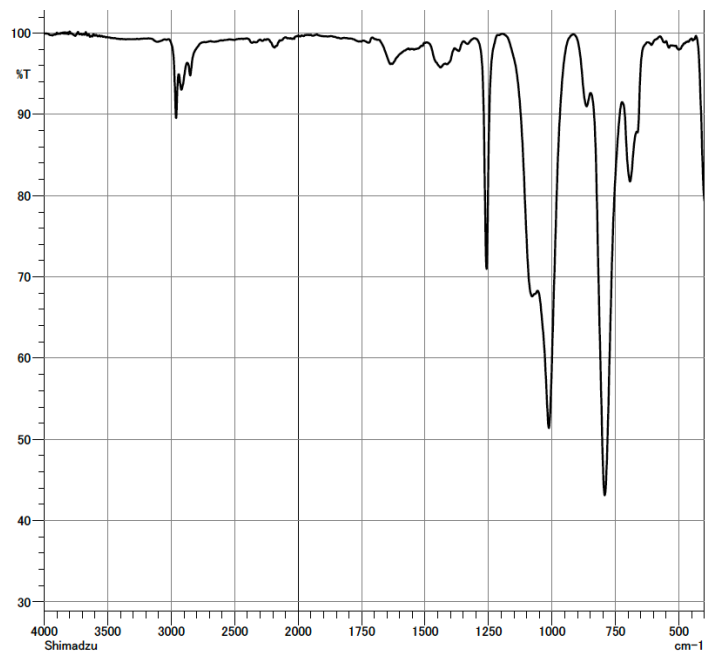

**Figure S12.** IR Spectrum of 7.



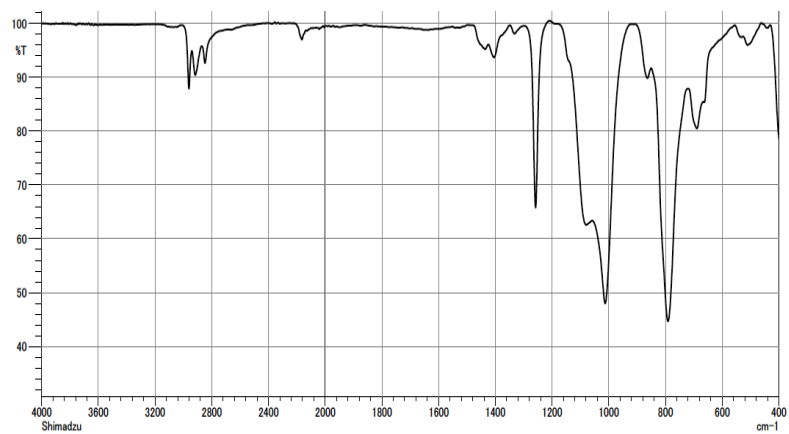

**Figure S13.** IR Spectrum of **8**.

### 3. Size Exclusion Chromatographic (SEC) Profiles

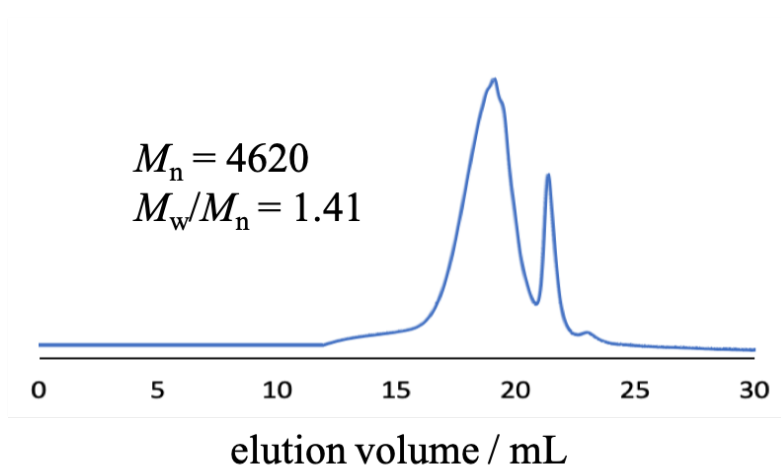

**Figure S14.** SEC profile of **7** after precipitation into ethanol/ethyl acetate (v/v = 9/1).

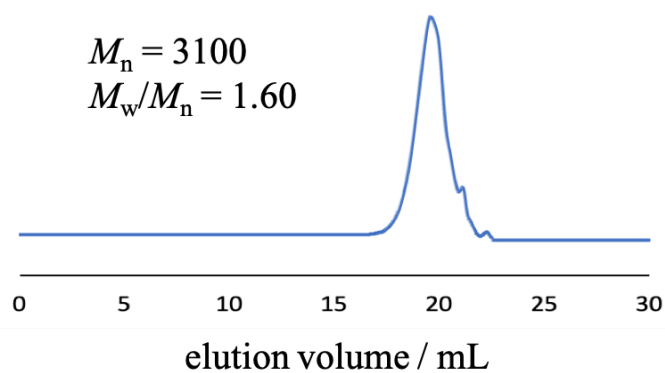

**Figure S15.** SEC profile of **8** after precipitation into ethanol/ethyl acetate (v/v = 9/1).

#### 4. DFT and TD-DFT Optimized Molecular Diagrams

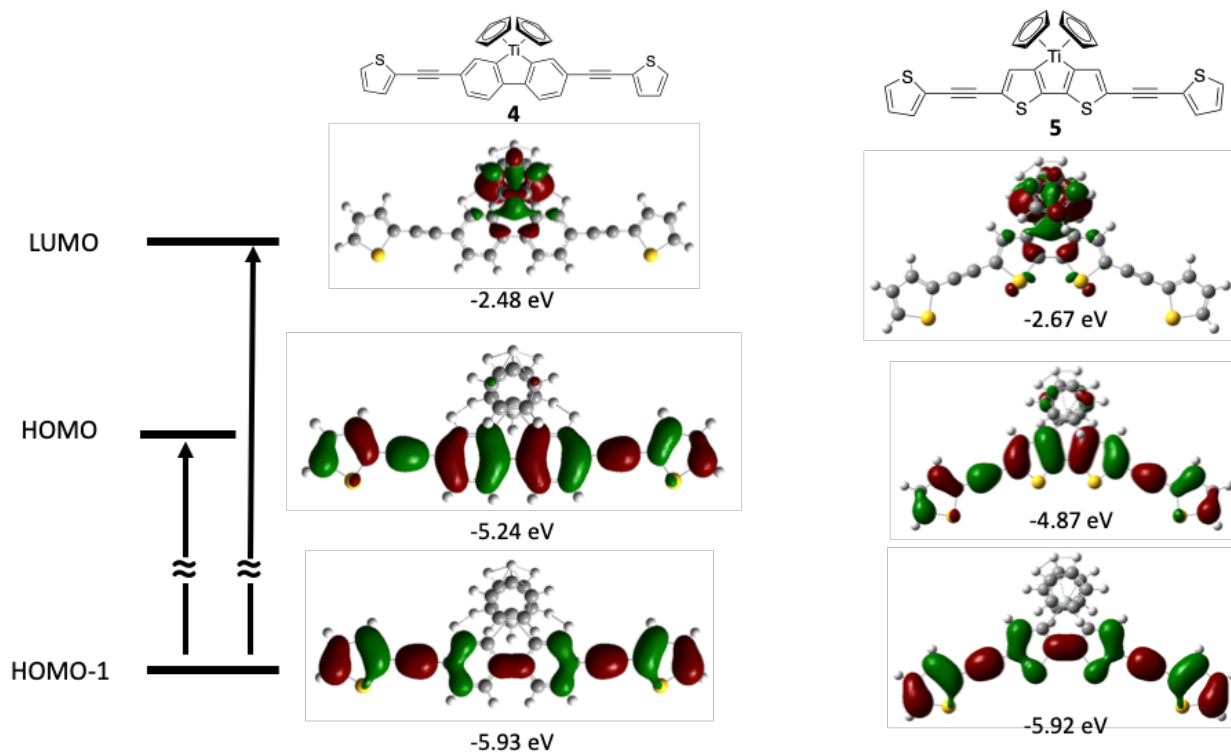

**Figure S16.** Energy profiles and molecular orbital diagrams of HOMO-1, HOMO, and LUMO of **4** and **5**.

**Table S1.** HOMO to LUMO and HOMO-1 to LUMO transitions by TD-DFT calculations.

| Assignment                                | <b>4</b>       |              | <b>5</b>       |              |
|-------------------------------------------|----------------|--------------|----------------|--------------|
|                                           | HOMO-1 to LUMO | HOMO to LUMO | HOMO-1 to LUMO | HOMO to LUMO |
| $\lambda_{\text{max}}$ (nm) <sup>a)</sup> | 446.06         | 570.99       | 766.85         | 939.12       |
| $f$ <sup>b)</sup>                         | 0.0499         | 0.0219       | 0.0058         | 0.0085       |
| Excitation energy (eV)                    | 2.7795         | 2.714        | 1.6168         | 1.3202       |

a) Calculated absorption maximum in the UV-vis spectrum. b) Oscillator strength.
